# Supplementary material
Source: ML conference proceedings conference paper supplement (https://proceedings.neurips.cc/paper_files/paper/2023/hash/4b5d47949866d06ab5c03022b4a5a551-Abstract.html)
Supplement: Supplementary file 1 [file 4b5d47949866d06ab5c03022b4a5a551-Supplemental-Conference.zip]

Archive with 1 entries (1 files):
- NeurIPS_2023__ReDS.pdf
